# Supplementary material for: Additional carbon inputs to reach a 4 per 1000 objective in Europe: feasibility and projected impacts of climate change based on Century simulations of long-term arable experiments
Source: Copernicus journal article supplement (doi:10.5194/bg-18-3981-2021), 2021-07-02
Supplement: Supplementary file 1 [file bg-18-3981-2021-supplement.pdf]

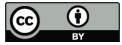

*Supplement of*

**Additional carbon inputs to reach a 4 per 1000 objective in Europe:  
feasibility and projected impacts of climate change based on  
Century simulations of long-term arable experiments**

**Elisa Bruni et al.**

*Correspondence to:* Elisa Bruni (elisa.bruni@lsce.ipsl.fr)

The copyright of individual parts of the supplement might differ from the article licence.

**Table S1: Default parameters of the Century model affecting litter and SOC dynamics (Parton et al., 1988).**

| Parameter | Matrix source         | Description                                                    | Value | Range     | Units |
|-----------|-----------------------|----------------------------------------------------------------|-------|-----------|-------|
| fam2a     | <b>A</b>              | Transfer fraction, aboveground metabolic litter to active SOC  | 0.45  | [0:1]     |       |
| fbm2a     | <b>A</b>              | Transfer fraction, belowground metabolic litter to active SOC  | 0.45  | [0:1]     |       |
| fas2a     | <b>A</b>              | Transfer fraction, aboveground structural litter to active SOC | 0.55  | [0:1]     |       |
| fbs2a     | <b>A</b>              | Transfer fraction, belowground structural litter to active SOC | 0.45  | [0:1]     |       |
| fas2s     | <b>A</b>              | Transfer fraction, aboveground structural litter to slow SOC   | 0.7   | [0:1]     |       |
| fbs2s     | <b>A</b>              | Transfer fraction, belowground structural litter to slow SOC   | 0.7   | [0:1]     |       |
| fa2p      | <b>A</b>              | Transfer fraction, active to passive SOC                       | 0.004 | [0:1]     |       |
| fs2a      | <b>A</b>              | Transfer fraction, slow to active SOC                          | 0.42  | [0:1]     |       |
| fs2p      | <b>A</b>              | Transfer fraction, slow to passive SOC                         | 0.03  | [0:1]     |       |
| fp2a      | <b>A</b>              | Transfer fraction, passive to active SOC                       | 0.45  | [0:1]     |       |
| clay      | <b>A</b> , $f_{clay}$ | Clay content                                                   |       | [0:1]     |       |
| lgc       | <b>A</b> , $f_L$      | Lignin coefficient of structural litters                       | 3     | [0:10]    |       |
| lga       | <b>A</b> , $f_L$      | Belowground lignin content                                     | 0.76  | [0:1]     |       |
| lgb       | <b>A</b> , $f_L$      | Aboveground lignin content                                     | 0.72  | [0:1]     |       |
| tau4ml    | <b>K</b>              | Turnover time, metabolic litter                                | 0.066 | [0:0.066] | year  |
| tau4sl    | <b>K</b>              | Turnover time, structural litter                               | 0.245 | [0:0.245] | year  |
| tau4a     | <b>K</b>              | Turnover time, active SOC                                      | 0.149 | [0:0.149] | year  |
| tau4s     | <b>K</b>              | Turnover time, slow SOC                                        | 5.48  | [0:5.48]  | year  |
| tau4p     | <b>K</b>              | Turnover time, passive SOC                                     | 241   | [0:241]   | year  |
